# Supplementary material for: First-Principles Study of Irn (n = 3–5) Clusters Adsorbed on Graphene and Hexagonal Boron Nitride: Structural and Magnetic Properties
Source: MDPI journal article supplement (doi:10.3390/nano12142436), 2022-07-16
Supplement: s1 [file s1]

---

## Supplementary Materials

### First-principles study of Ir<sub>n</sub> (n = 3-5) clusters adsorbed on graphene and hexagonal boron nitride: structural and magnetic properties

Mei Ge <sup>1,2</sup>, Leiting Chu <sup>1,2</sup>, Miaomiao Guo <sup>1,2</sup>, Yan Su <sup>3</sup> and Junfeng Zhang <sup>1,2\*</sup>

<sup>1</sup> School of Physics and Information Engineering, Shanxi Normal University, Taiyuan, 030031, China; ge-meis@sxnu.edu.cn (M. G.); chult123@163.com (L. C.); guomm95@163.com (M. G.)

<sup>2</sup> Key Laboratory of Spectral Measurement and Analysis of Shanxi Province, Shanxi Normal University, Taiyuan, 030031, China

<sup>3</sup> Key Laboratory of Materials Modification by Laser, Electron, and Ion Beams (Dalian University of Technology), Ministry of Education, Dalian, 116024, China; [su.yan@dlut.edu.cn](mailto:su.yan@dlut.edu.cn)

\* Correspondence: [zhangjf@sxnu.edu.cn](mailto:zhangjf@sxnu.edu.cn); Tel.: +86-13935705526

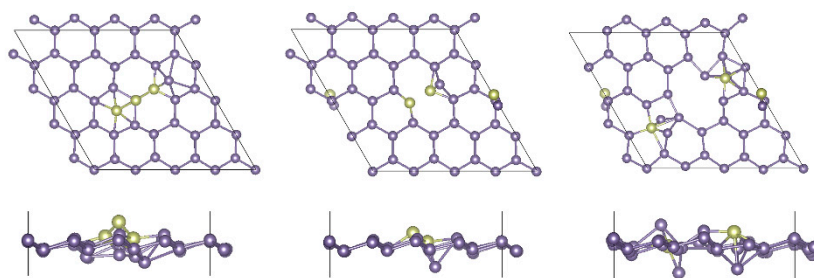

**Figure S1** Three optimized configurations of  $\text{Ir}_3$  on Germanene.

---

**Table S1** The relative energies (in meV) of ferromagnetic (FM) and anti-ferromagnetic (AFM) states for the free-standing  $\text{Ir}_n$  and  $\text{Ir}_n$  on graphene and  $h\text{BN}$  substrates. We set the energy of FM ( $E_{\text{FM}}$ ) state as zero.

| n | Free standing   |                  | On graphene     |                  | On $h\text{BN}$ |                  |
|---|-----------------|------------------|-----------------|------------------|-----------------|------------------|
|   | $E_{\text{FM}}$ | $E_{\text{AFM}}$ | $E_{\text{FM}}$ | $E_{\text{AFM}}$ | $E_{\text{FM}}$ | $E_{\text{AFM}}$ |
| 3 | 0               | 0.0002           | 0               | 0.0114           | 0               | 0.0198           |
| 4 | 0               | 511.916          | 0               | 16.7884          | 0               | 255.587          |
| 5 | 0               | 0.0659           | 0               | 0.0182           | 0               | 0.0022           |

---
